# Supplementary material for: A novel electrochemical immunosensor based on dual signal amplification of gold nanoparticles and telomerase extension reaction
Source: Royal Society of Chemistry journal article supplement (doi:10.1039/c3ay42237b), 2014-01-01
Supplement: c3ay42237b.doc [file c3ay42237b.doc]

**Electronic Supplementary Information (ESI)**

**A Novel Electrochemical Immunosensor Based on Dual Signal Amplification of Gold Nanoparticles and Telomerase Extension Reaction**

Xiao-Yan Li, Zi Yi, Hao Tang, Xia Chu*, Ru-Qin Yu

State Key Laboratory of Chemo/Biosensing and Chemometrics, College of Chemistry and Chemical Engineering, Hunan University, Changsha, 410082, P. R. China

*To whom correspondence should be addressed.

Tel: +86-731-88821916.

Fax: +86-731-88821916.

E-mail address: xiachu@hnu.edu.cn

**Table S1**. Oligonucleotide sequences used in this work

|  | |
| --- | --- |
| Entry | Sequences |
| Probe P1 | 5’-SH-TTTTTTAATCCGTCGAGCAGAGTT-3’ |
| Probe P2 | 5’-biotin-CCCTAA CCCTAA-3’ |
| Probe P3 | 5’-biotin-TTTTTTAATCCGTCGAGCAGAGTT-3’ |
| Telomerase product | 5’-SH-TTTTTTAATCCGTCGAGCAGAGTTAG(GGTTAG)n-3’ |
|  |  |


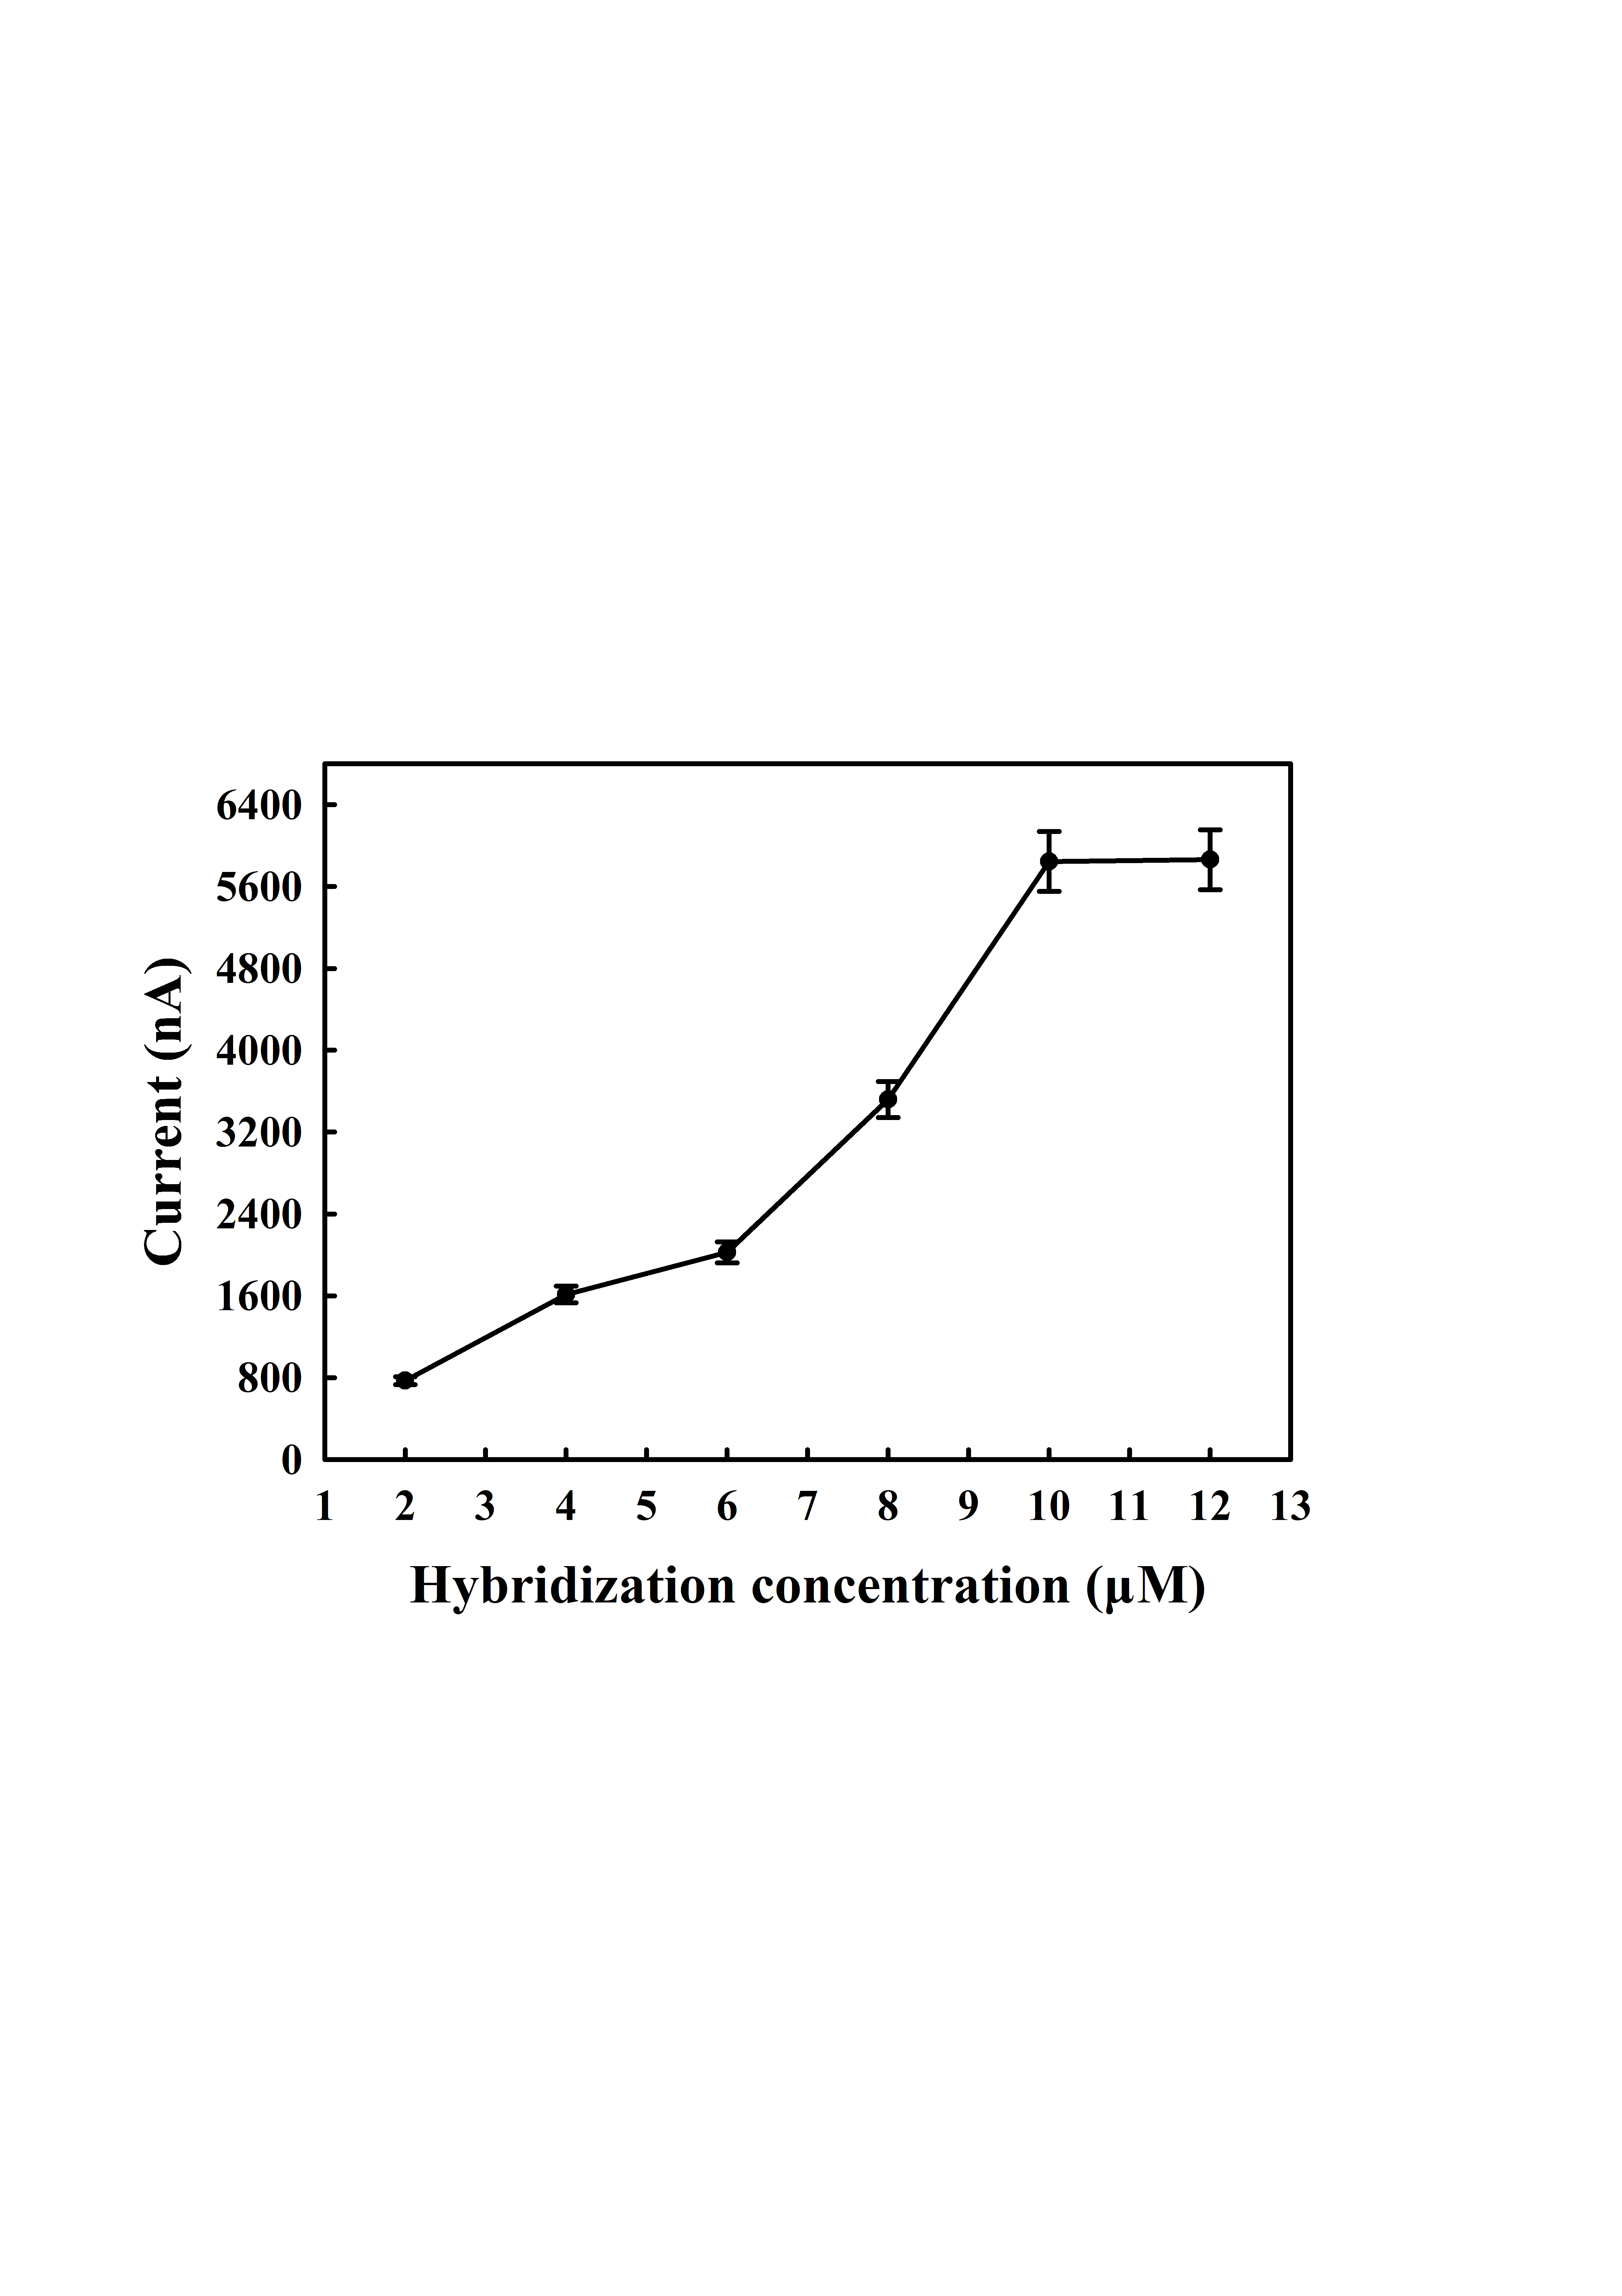


**Fig. S1**. Effect of the probe P2 concentration for the electrochemical immunoassay. The hybridization reaction was performed for 2 h at 33 °C in the PBS buffer (10 mM PB, 0.3 M NaCl, pH 7.4).


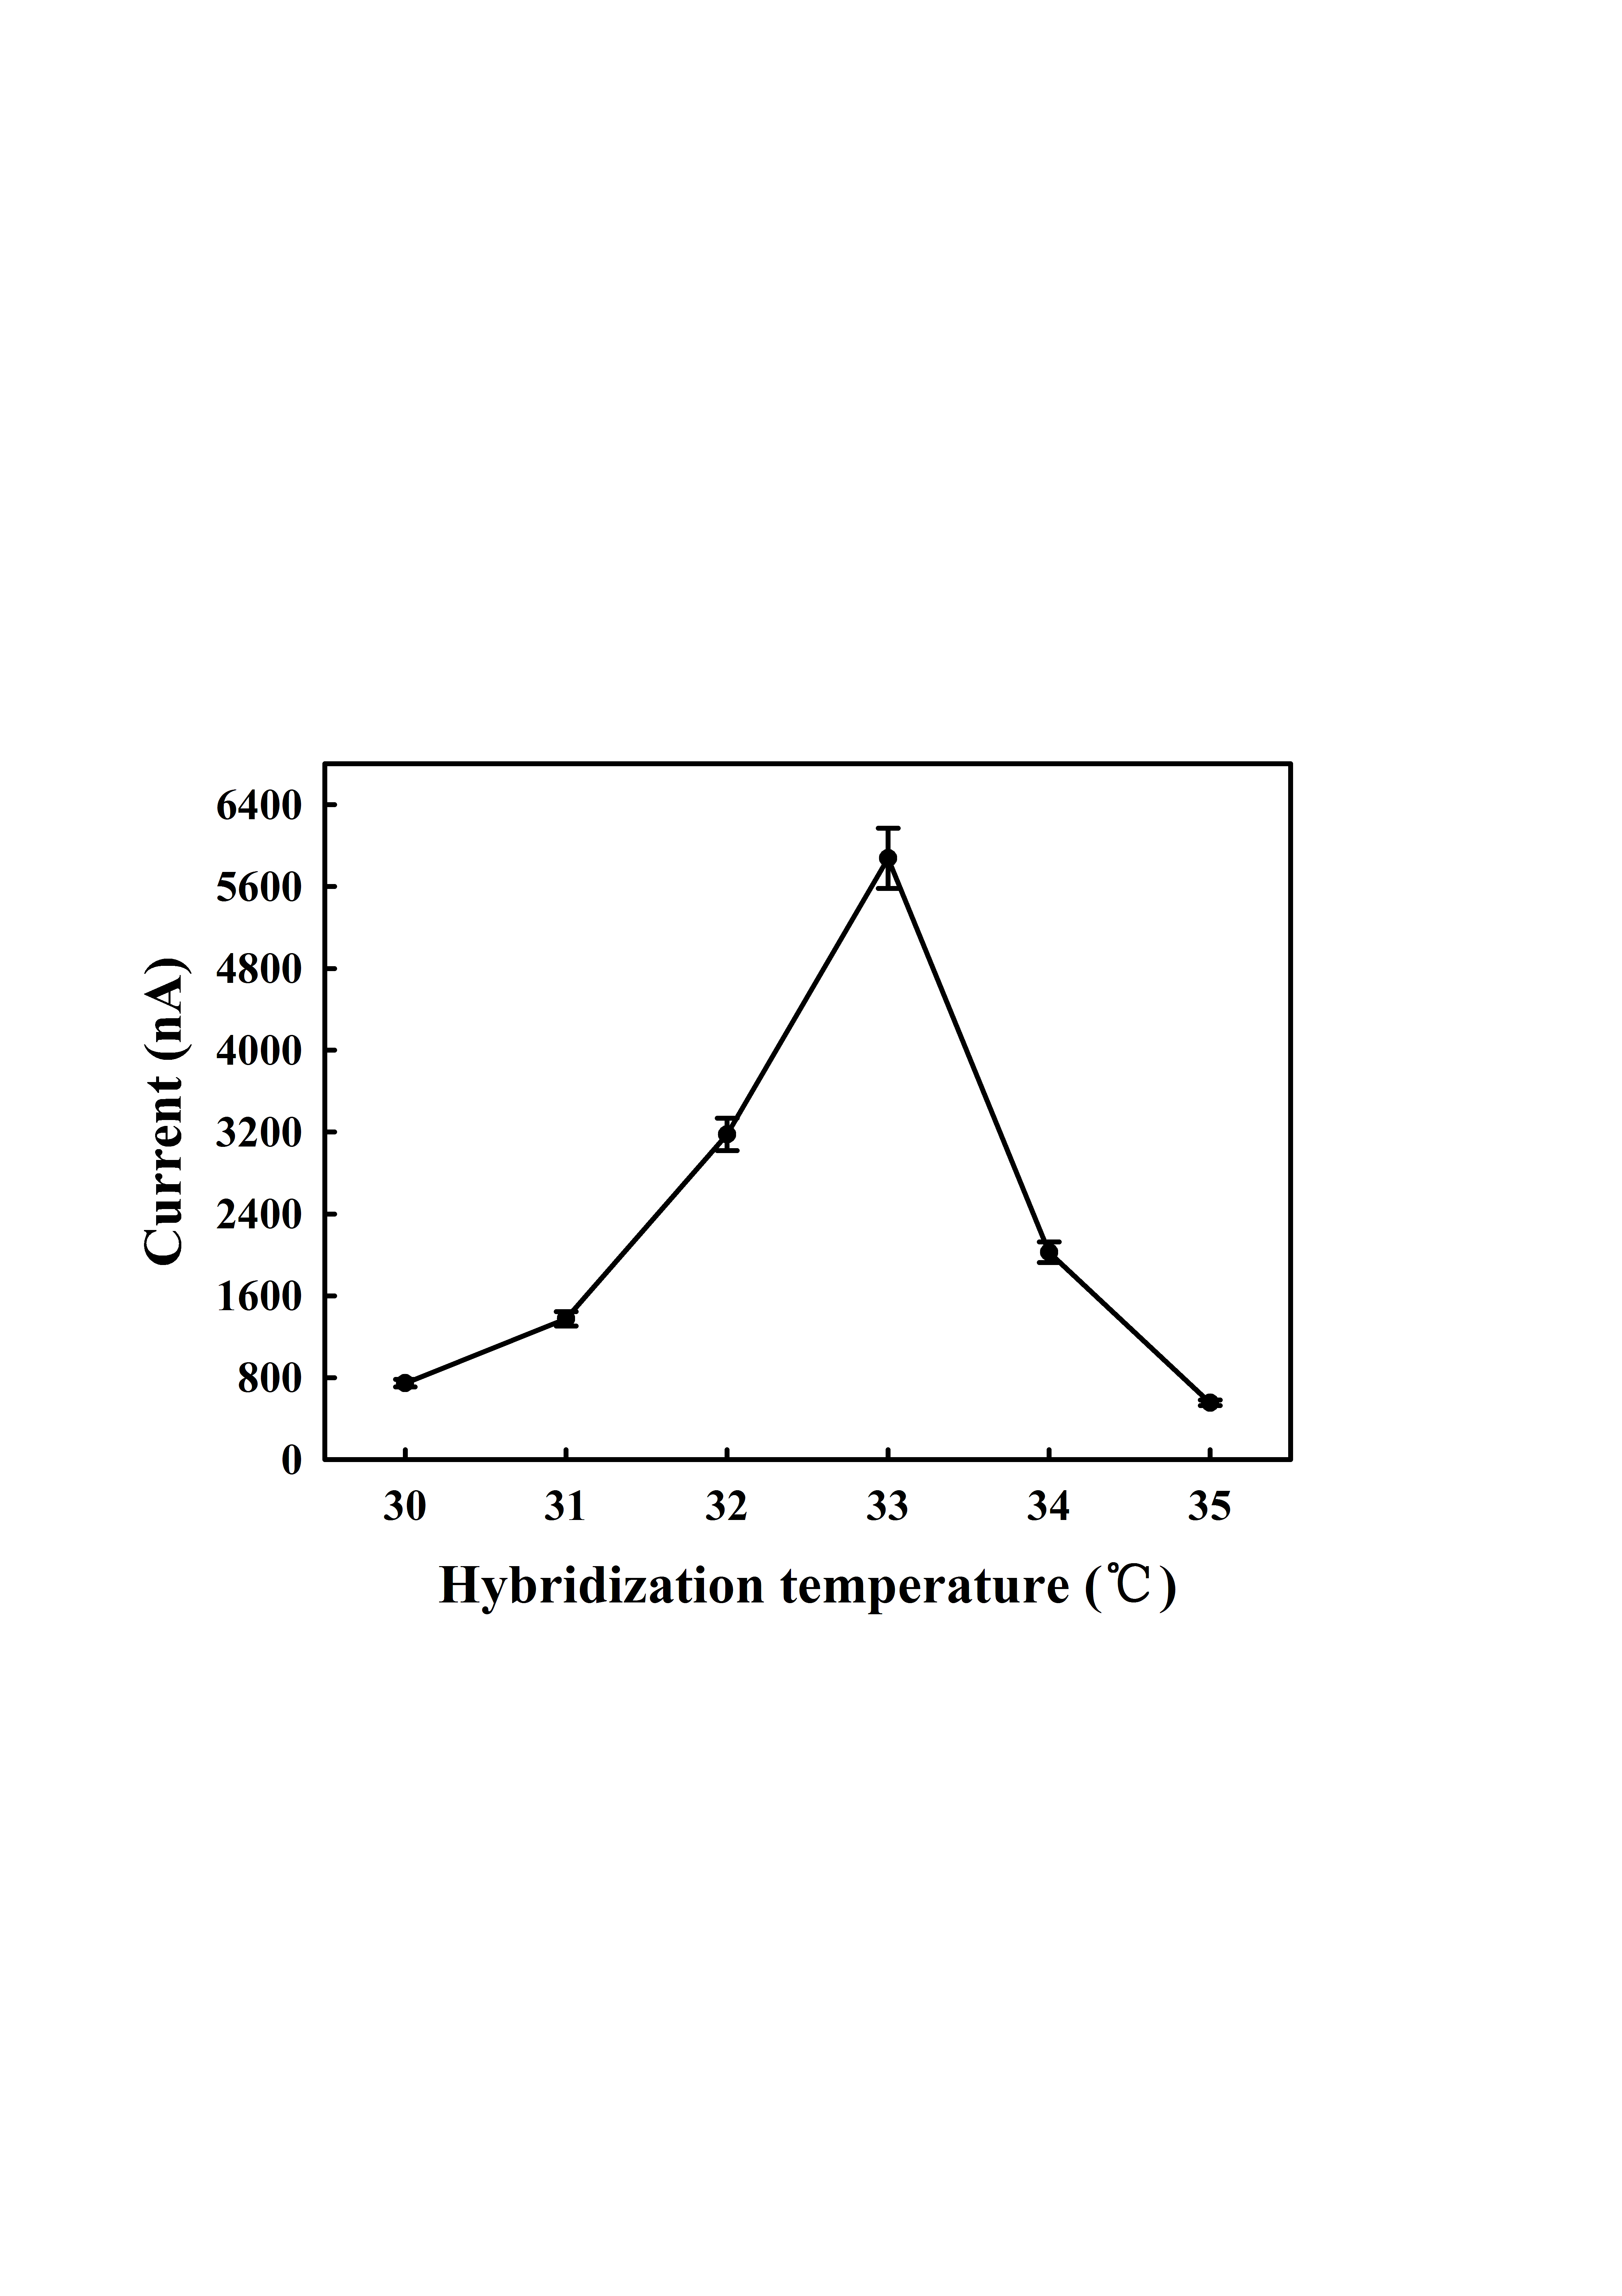


**Fig. S2**.Effect of the hybridization reaction temperature for the electrochemical immunoassay. The hybridization reaction was performed in the PBS buffer (10 mM PB, 0.3 M NaCl, pH 7.4).


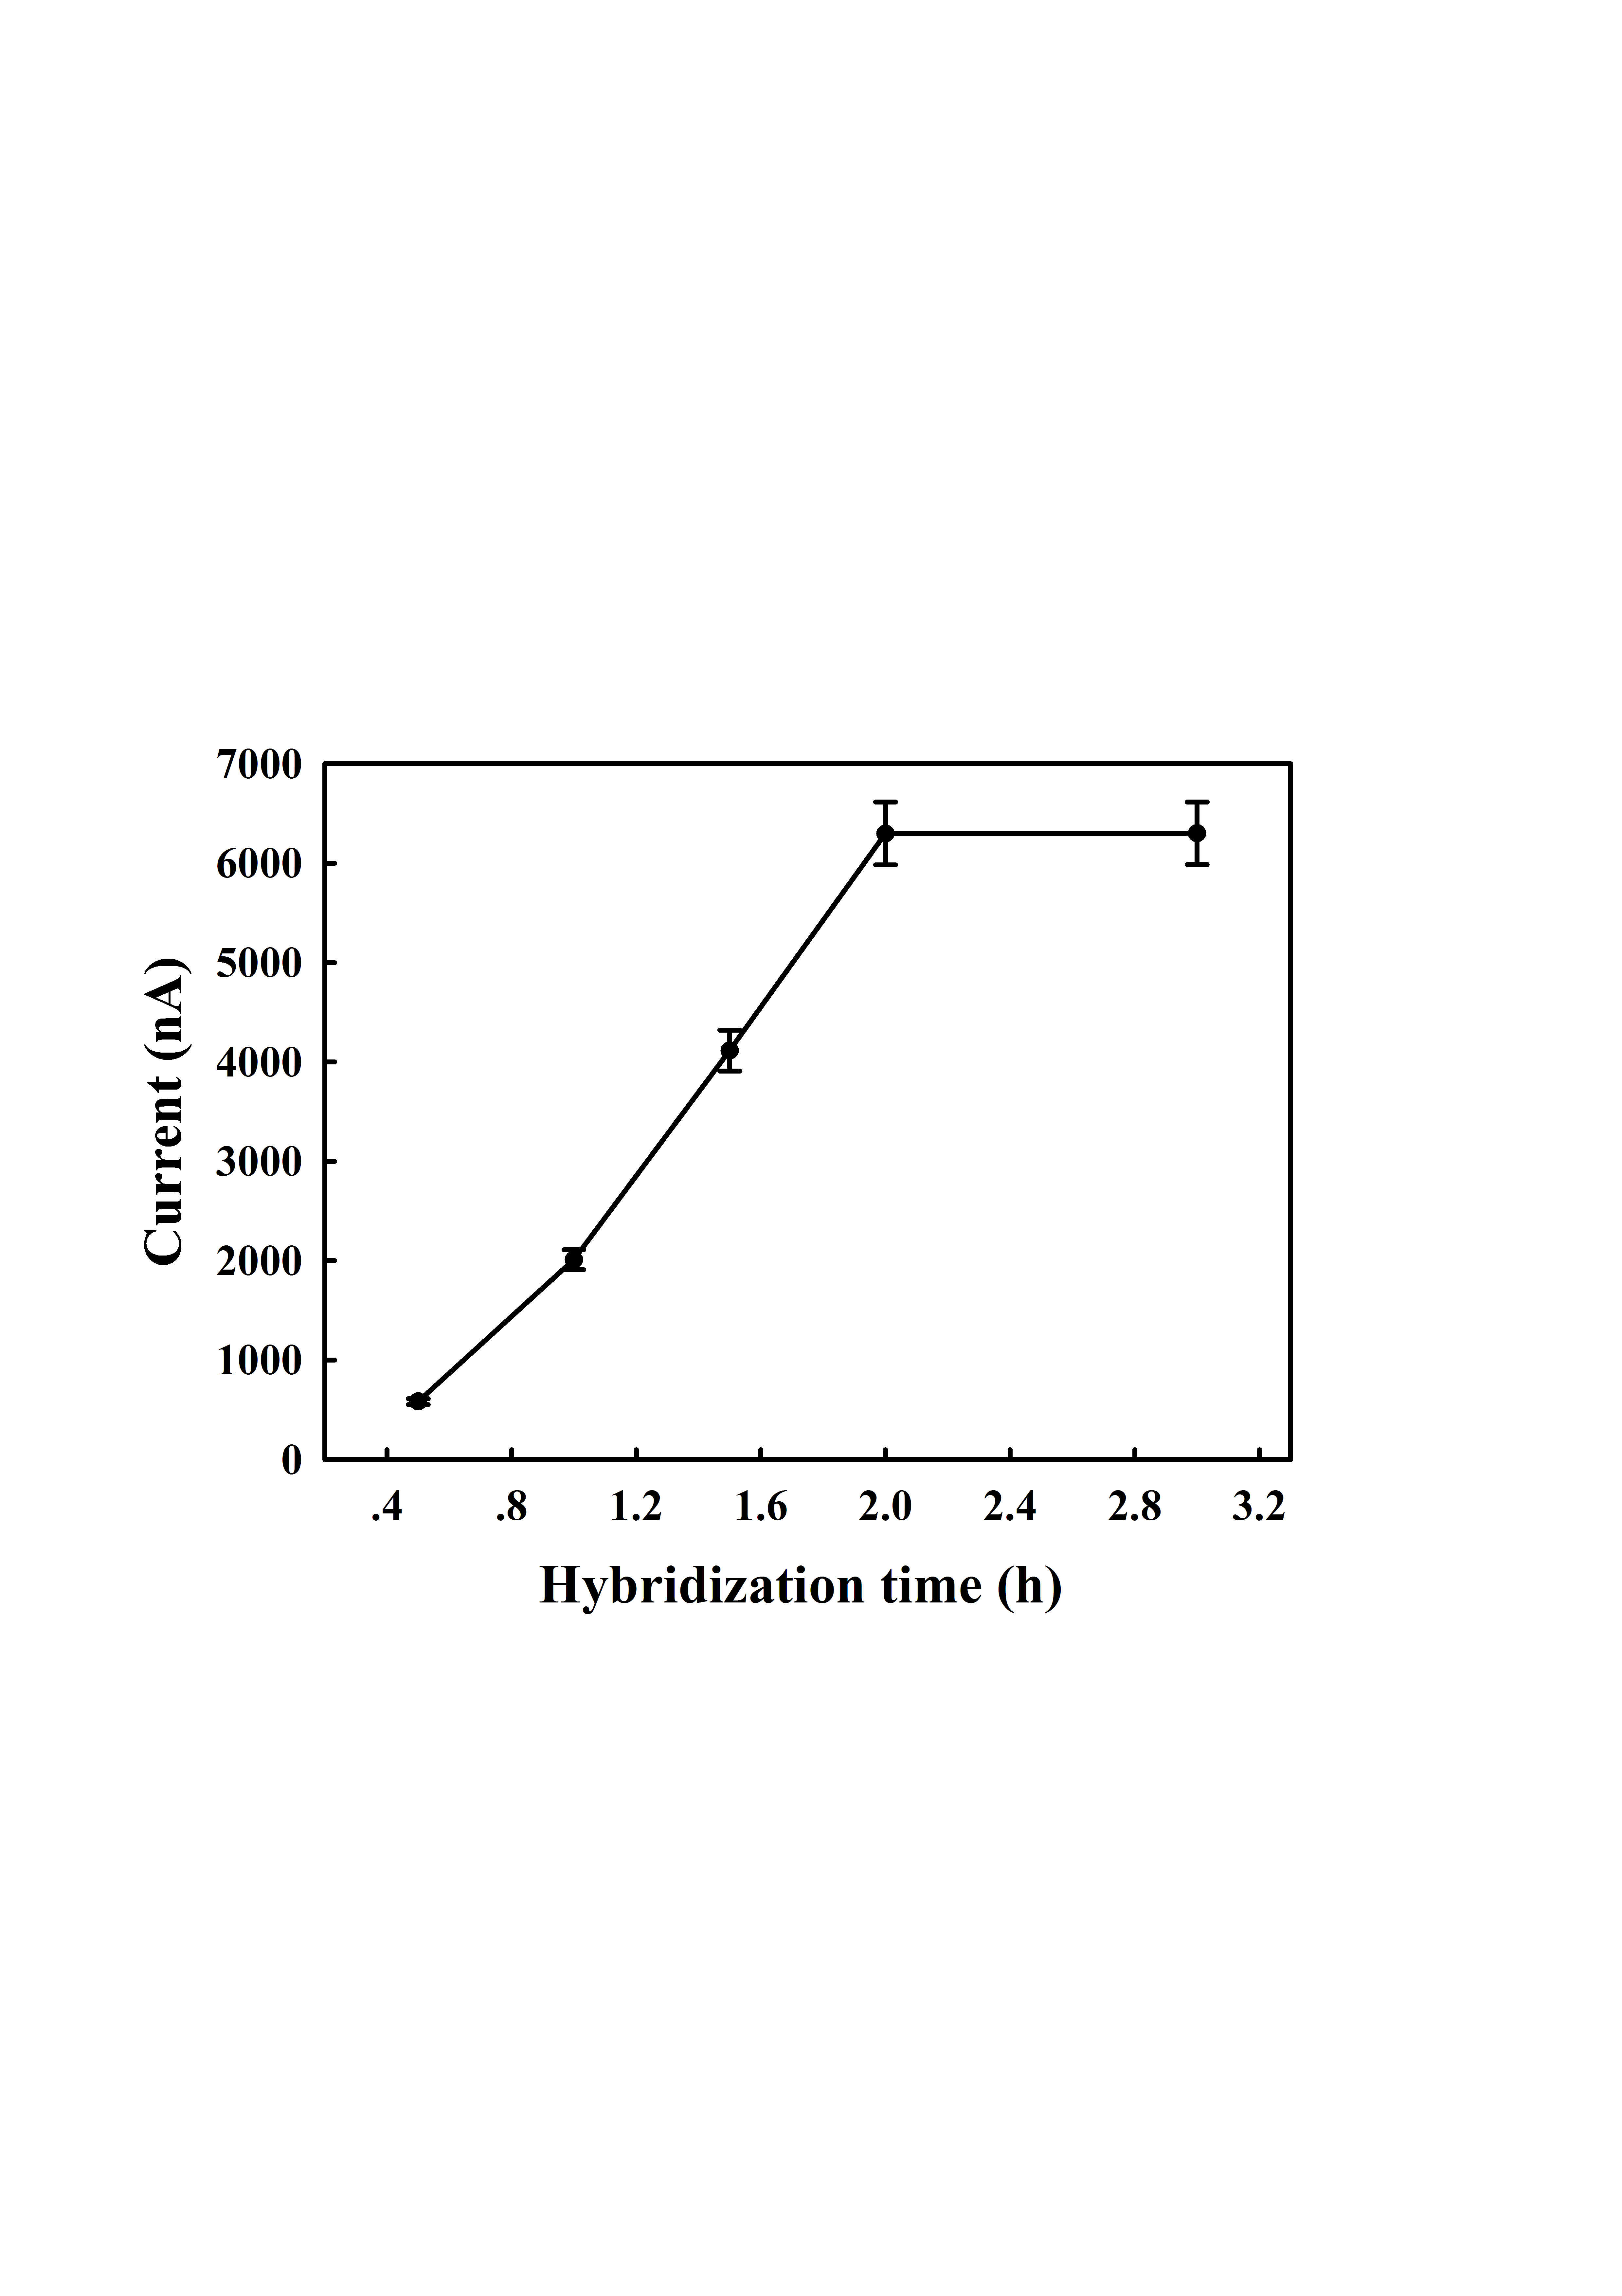


**Fig. S3.** Effect of the hybridization reaction time for the electrochemical immunoassay. The hybridization reaction was performed at 33 °C in the PBS buffer (10 mM PB, 0.3 M NaCl, pH 7.4).
